# Supplementary material
Source: MDPI journal article supplement (https://www.mdpi.com/2076-3417/14/5/2098)
Supplement: s1 [file s1]

## SUPPLEMENTARY MATERIAL

**Table S1.** Principal component analysis of gait data: rotated component matrix

|                     | Component |       |        |       |       |       |        |       |
|---------------------|-----------|-------|--------|-------|-------|-------|--------|-------|
|                     | 1         | 2     | 3      | 4     | 5     | 6     | 7      | 8     |
| DLS                 | 0.963     |       |        |       |       |       |        |       |
| PS                  | 0.902     |       |        |       |       |       |        |       |
| SLS                 | -0.832    |       |        |       |       |       |        |       |
| LR                  | 0.827     |       |        |       |       |       |        |       |
| SW                  | -0.754    |       |        |       |       |       |        |       |
| DLS CoV             |           | 0.970 |        |       |       |       |        |       |
| PS CoV              |           | 0.931 |        |       |       |       |        |       |
| LR CoV              |           | 0.852 |        |       |       |       |        |       |
| SLS CoV             |           | 0.829 |        |       |       |       |        |       |
| SW CoV              |           | 0.538 |        |       |       |       |        |       |
| Swing duration      |           |       | 0.929  |       |       |       |        |       |
| Stride duration     |           |       | 0.886  |       |       |       |        |       |
| Cadence             |           |       | -0.879 |       |       |       |        |       |
| Stance duration     |           |       | 0.804  |       |       |       |        |       |
| Stride duration CoV |           |       |        | 0.943 |       |       |        |       |
| Cadence CoV         |           |       |        | 0.941 |       |       |        |       |
| Stance duration CoV |           |       |        | 0.861 |       |       |        |       |
| Velocity CoV        |           |       |        | 0.722 |       |       |        |       |
| Step Length         |           |       |        |       | 0.884 |       |        |       |
| Stride Length       |           |       |        |       | 0.877 |       |        |       |
| Velocity            |           |       |        |       | 0.685 |       |        |       |
| Step Length CoV     |           |       |        |       |       | 0.828 |        |       |
| Stride Length CoV   |           |       |        |       |       | 0.767 |        |       |
| TS                  |           |       |        |       |       |       | 0.951  |       |
| MS                  |           |       |        |       |       |       | -0.936 |       |
| MS CoV              |           |       |        |       |       |       |        | 0.884 |
| TS CoV              |           |       |        |       |       |       |        | 0.857 |
| Swing duration CoV  |           |       |        |       |       |       |        |       |

**Table S2.** Principal component analysis of gait data: total variance explained

| Component           | Initial Eigenvalues |               |              | Extraction Sums of Squared Loadings |               |              | Rotation Sums of Squared Loadings |               |              |
|---------------------|---------------------|---------------|--------------|-------------------------------------|---------------|--------------|-----------------------------------|---------------|--------------|
|                     | Total               | % of Variance | Cumulative % | Total                               | % of Variance | Cumulative % | Total                             | % of Variance | Cumulative % |
| 1 – Gait cycle      | 8.244               | 29.444        | 29.444       | 8.244                               | 29.444        | 29.444       | 5.046                             | 18.022        | 18.022       |
| 2 – Gait cycle CoV  | 4.717               | 16.847        | 46.291       | 4.717                               | 16.847        | 46.291       | 4.123                             | 14.726        | 32.748       |
| 3 – Gait rhythm     | 3.363               | 12.010        | 58.301       | 3.363                               | 12.010        | 58.301       | 3.813                             | 13.619        | 46.367       |
| 4 – Gait rhythm CoV | 2.597               | 9.273         | 67.574       | 2.597                               | 9.273         | 67.574       | 3.595                             | 12.840        | 59.207       |
| 5 – Gait pace       | 1.931               | 6.895         | 74.470       | 1.931                               | 6.895         | 74.470       | 2.493                             | 8.903         | 68.110       |
| 6 – Gait pace CoV   | 1.615               | 5.769         | 80.238       | 1.615                               | 5.769         | 80.238       | 2.207                             | 7.881         | 75.991       |
| 7 – Midstance       | 1.421               | 5.076         | 85.314       | 1.421                               | 5.076         | 85.314       | 2.052                             | 7.327         | 83.318       |
| 8 – Midstance CoV   | 1.093               | 3.905         | 89.219       | 1.093                               | 3.905         | 89.219       | 1.652                             | 5.901         | 89.219       |
| 9                   | 0.920               | 3.287         | 92.506       |                                     |               |              |                                   |               |              |
| 10                  | 0.613               | 2.190         | 94.697       |                                     |               |              |                                   |               |              |
| 11                  | 0.312               | 1.113         | 95.809       |                                     |               |              |                                   |               |              |
| 12                  | 0.270               | 0.965         | 96.774       |                                     |               |              |                                   |               |              |
| 13                  | 0.238               | 0.849         | 97.623       |                                     |               |              |                                   |               |              |
| 14                  | 0.225               | 0.803         | 98.426       |                                     |               |              |                                   |               |              |
| 15                  | 0.175               | 0.624         | 99.050       |                                     |               |              |                                   |               |              |
| 16                  | 0.112               | 0.398         | 99.448       |                                     |               |              |                                   |               |              |
| 17                  | 0.070               | 0.252         | 99.700       |                                     |               |              |                                   |               |              |
| 18                  | 0.026               | 0.093         | 99.793       |                                     |               |              |                                   |               |              |
| 19                  | 0.024               | 0.085         | 99.878       |                                     |               |              |                                   |               |              |
| 20                  | 0.015               | 0.055         | 99.933       |                                     |               |              |                                   |               |              |
| 21                  | 0.011               | 0.038         | 99.971       |                                     |               |              |                                   |               |              |
| 22                  | 0.006               | 0.020         | 99.991       |                                     |               |              |                                   |               |              |
| 23                  | 0.001               | 0.004         | 99.995       |                                     |               |              |                                   |               |              |
| 24                  | 0.001               | 0.003         | 99.998       |                                     |               |              |                                   |               |              |
| 25                  | 0.000               | 0.002         | 100.000      |                                     |               |              |                                   |               |              |
| 26                  | 2.493E-06           | 8.904E-06     | 100.000      |                                     |               |              |                                   |               |              |

**Table S3.** Principal component analysis of visual data: rotated component matrix

|             | Component |       |
|-------------|-----------|-------|
|             | 1         | 2     |
| CSC at 3m   | 0.929     |       |
| CSC at 4m   | 0.907     |       |
| CSC at 2m   | 0.901     |       |
| CSC at 1.6m | 0.853     |       |
| VABC        | 0.837     |       |
| CSU at 2m   |           | 0.869 |
| CSU at 1.6m |           | 0.866 |
| CSU at 3m   |           | 0.824 |
| CSU at 4m   |           | 0.714 |
| VABU        |           | 0.665 |

**Table S4.** Principal component analysis of vision data: total variance explained

| Component              | Initial Eigenvalues |               |              | Extraction Sums of Squared Loadings |               |              | Rotation Sums of Squared Loadings |               |              |
|------------------------|---------------------|---------------|--------------|-------------------------------------|---------------|--------------|-----------------------------------|---------------|--------------|
|                        | Total               | % of Variance | Cumulative % | Total                               | % of Variance | Cumulative % | Total                             | % of Variance | Cumulative % |
| 1 – Corrected vision   | 7.022               | 70.217        | 70.217       | 7.022                               | 70.217        | 70.217       | 5.063                             | 50.630        | 50.630       |
| 2 – Uncorrected vision | 1.374               | 13.744        | 83.962       | 1.374                               | 13.744        | 83.962       | 3.333                             | 33.332        | 83.962       |
| 3                      | 0.742               | 7.422         | 91.384       |                                     |               |              |                                   |               |              |
| 4                      | 0.399               | 3.988         | 95.372       |                                     |               |              |                                   |               |              |
| 5                      | 0.175               | 1.747         | 97.119       |                                     |               |              |                                   |               |              |
| 6                      | 0.116               | 1.161         | 98.280       |                                     |               |              |                                   |               |              |
| 7                      | 0.105               | 1.047         | 99.327       |                                     |               |              |                                   |               |              |
| 8                      | 0.032               | 0.317         | 99.644       |                                     |               |              |                                   |               |              |
| 9                      | 0.023               | 0.226         | 99.870       |                                     |               |              |                                   |               |              |
| 10                     | 0.013               | 0.130         | 100.000      |                                     |               |              |                                   |               |              |

**Table S5.** Principal component analysis of auditory data: rotated component matrix

|                              | Component |       |        |
|------------------------------|-----------|-------|--------|
|                              | 1         | 2     | 3      |
| SRW total number of mistakes | -0.946    |       |        |
| SRW average                  | 0.946     |       |        |
| SRS total number of mistakes | -0.939    |       |        |
| SRS average                  | 0.939     |       |        |
| SRS better                   | 0.933     |       |        |
| SRW better                   | 0.898     |       |        |
| SRT average                  |           | 0.952 |        |
| SRT better                   |           | 0.923 |        |
| PTA average                  |           | 0.910 |        |
| PTA better                   |           | 0.897 |        |
| WRS better                   |           |       | 0.900  |
| WR total number of mistakes  |           |       | -0.898 |
| WR average                   |           |       | 0.898  |

**Table S6.** Principal component analysis of auditory data: total variance explained

| Component                | Initial Eigenvalues |               |              | Extraction Sums of Squared Loadings |               |              | Rotation Sums of Squared Loadings |               |              |
|--------------------------|---------------------|---------------|--------------|-------------------------------------|---------------|--------------|-----------------------------------|---------------|--------------|
|                          | Total               | % of Variance | Cumulative % | Total                               | % of Variance | Cumulative % | Total                             | % of Variance | Cumulative % |
| 1 – Sentence recognition | 6.545               | 50.343        | 50.343       | 6.545                               | 50.343        | 50.343       | 5.451                             | 41.929        | 41.929       |
| 2 – Hearing level        | 3.800               | 29.231        | 79.574       | 3.800                               | 29.231        | 79.574       | 3.728                             | 28.678        | 70.606       |
| 3 – Word recognition     | 1.465               | 11.269        | 90.843       | 1.465                               | 11.269        | 90.843       | 2.631                             | 20.237        | 90.843       |
| 4                        | 0.368               | 2.833         | 93.676       |                                     |               |              |                                   |               |              |
| 5                        | 0.349               | 2.688         | 96.364       |                                     |               |              |                                   |               |              |
| 6                        | 0.206               | 1.581         | 97.945       |                                     |               |              |                                   |               |              |
| 7                        | 0.146               | 1.126         | 99.071       |                                     |               |              |                                   |               |              |
| 8                        | 0.060               | 0.464         | 99.535       |                                     |               |              |                                   |               |              |
| 9                        | 0.044               | 0.342         | 99.877       |                                     |               |              |                                   |               |              |
| 10                       | 0.016               | 0.120         | 99.997       |                                     |               |              |                                   |               |              |
| 11                       | 0.000               | 0.003         | 100.000      |                                     |               |              |                                   |               |              |

|    |           |       |         |  |  |  |  |  |  |
|----|-----------|-------|---------|--|--|--|--|--|--|
| 12 | 0.00<br>0 | 0.000 | 100.000 |  |  |  |  |  |  |
| 13 | 0.00<br>0 | 0.000 | 100.000 |  |  |  |  |  |  |

**Table S7.** Principal component analysis of postural stability data: rotated component matrix

|          | Component |       |        |
|----------|-----------|-------|--------|
|          | 1         | 2     | 3      |
| OSI EO   | 0.929     |       |        |
| MLSI EO  | 0.850     |       |        |
| APSI EO  | 0.803     |       |        |
| APSI EC  |           | 0.926 |        |
| OSI EC   |           | 0.826 |        |
| MLSI EC  |           | 0.762 |        |
| RT EC    |           |       | 0.799  |
| RT EO    |           |       | 0.699  |
| LOS time |           |       | -0.587 |
| FRI      |           |       |        |

**Table S8.** Principal component analysis of postural stability data: total variance explained

| Component           | Initial Eigenvalues |               |              | Extraction Sums of Squared Loadings |               |              | Rotation Sums of Squared Loadings |               |              |
|---------------------|---------------------|---------------|--------------|-------------------------------------|---------------|--------------|-----------------------------------|---------------|--------------|
|                     | Total               | % of Variance | Cumulative % | Total                               | % of Variance | Cumulative % | Total                             | % of Variance | Cumulative % |
| 1 – Eyes open PS    | 3.838               | 38.379        | 38.379       | 3.838                               | 38.379        | 38.379       | 3.318                             | 33.183        | 33.183       |
| 2 – Eyes closed PS  | 1.473               | 14.731        | 53.110       | 1.473                               | 14.731        | 53.110       | 1.792                             | 17.919        | 51.103       |
| 3 – PS testing time | 1.392               | 13.924        | 67.034       | 1.392                               | 13.924        | 67.034       | 1.593                             | 15.932        | 67.034       |
| 4                   | 0.967               | 9.671         | 76.705       |                                     |               |              |                                   |               |              |
| 5                   | 0.751               | 7.510         | 84.215       |                                     |               |              |                                   |               |              |
| 6                   | 0.685               | 6.849         | 91.064       |                                     |               |              |                                   |               |              |
| 7                   | 0.522               | 5.221         | 96.285       |                                     |               |              |                                   |               |              |
| 8                   | 0.330               | 3.304         | 99.589       |                                     |               |              |                                   |               |              |
| 9                   | 0.037               | 0.371         | 99.960       |                                     |               |              |                                   |               |              |
| 10                  | 0.004               | 0.040         | 100.000      |                                     |               |              |                                   |               |              |

**Table S9.** Principal component analysis of olfactory data: rotated component matrix

| Component                |       |
|--------------------------|-------|
| 1                        |       |
| Olfactory Discrimination | 0.799 |
| Olfaction Threshold      | 0.799 |

**Table S10.** Principal component analysis of olfactory data: total variance explained

| Component          | Initial Eigenvalues |               |              | Extraction Sums of Squared Loadings |               |              |
|--------------------|---------------------|---------------|--------------|-------------------------------------|---------------|--------------|
|                    | Total               | % of Variance | Cumulative % | Total                               | % of Variance | Cumulative % |
| 1 – Sense of smell | 1.277               | 63.856        | 63.856       | 1.277                               | 63.856        | 63.856       |
| 2                  | 0.723               | 36.144        | 100.000      |                                     |               |              |

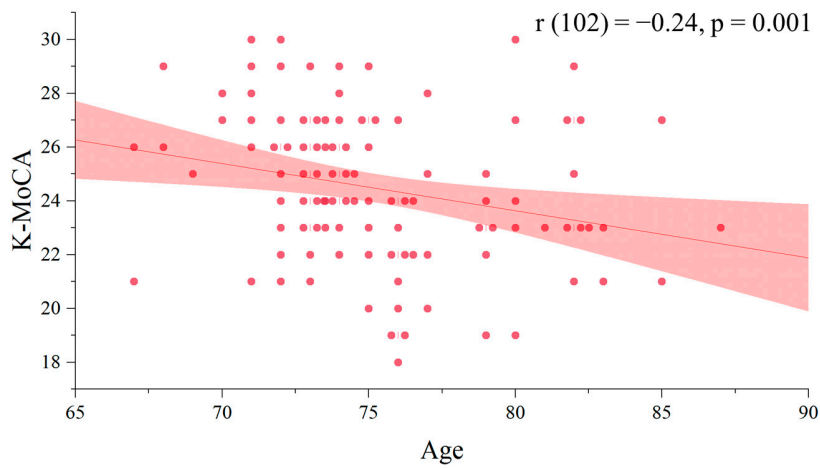

**Figure S1.** Correlation between K-MoCA score and age

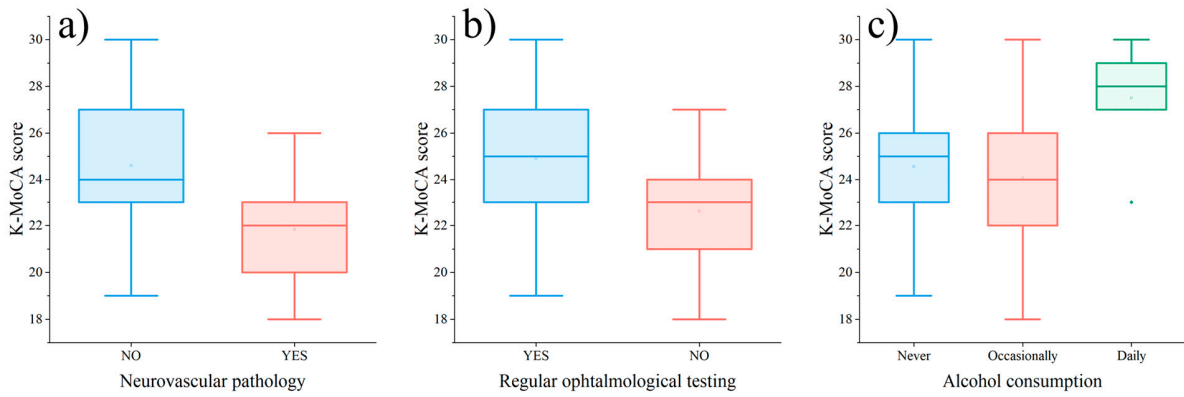

**Figure S2.** K-MoCA score depending on a) neurovascular pathology, b) regular ophthalmological testing, and c) alcohol consumption

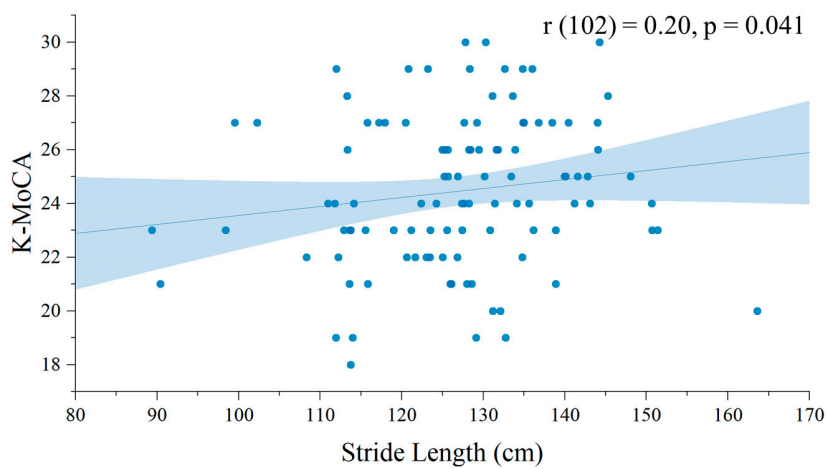

**Figure S3.** Correlation between K-MoCA score and stride length

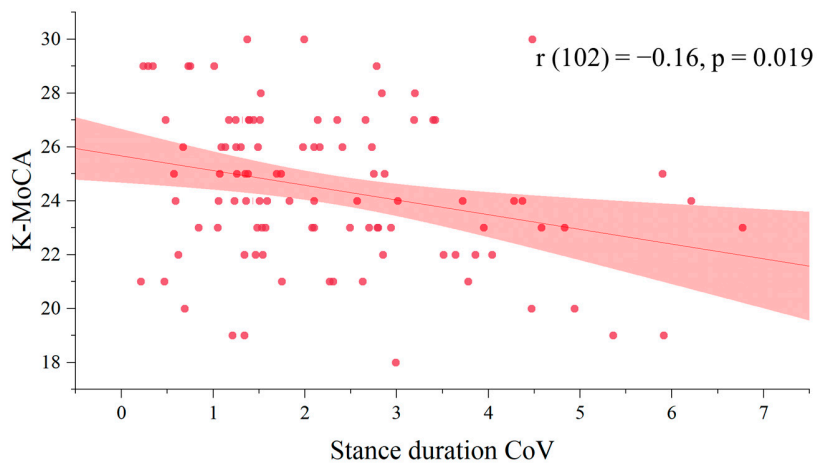

**Figure S4.** Correlation between K-MoCA score and stance duration CoV

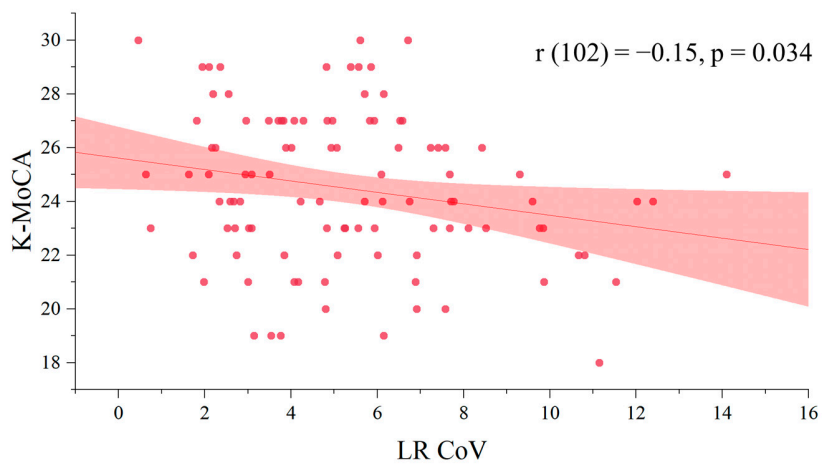

**Figure S5.** Correlation between K-MoCA score and LR CoV



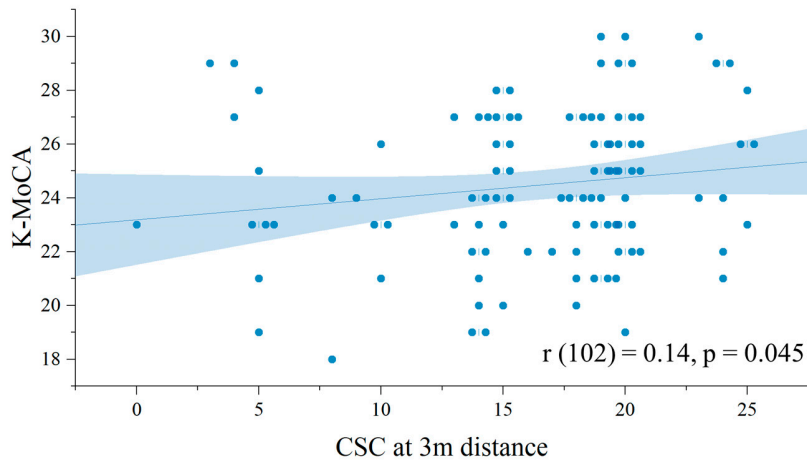

**Figure S6.** Correlation between K-MoCA score and corrected contrast sensitivity at 3m distance

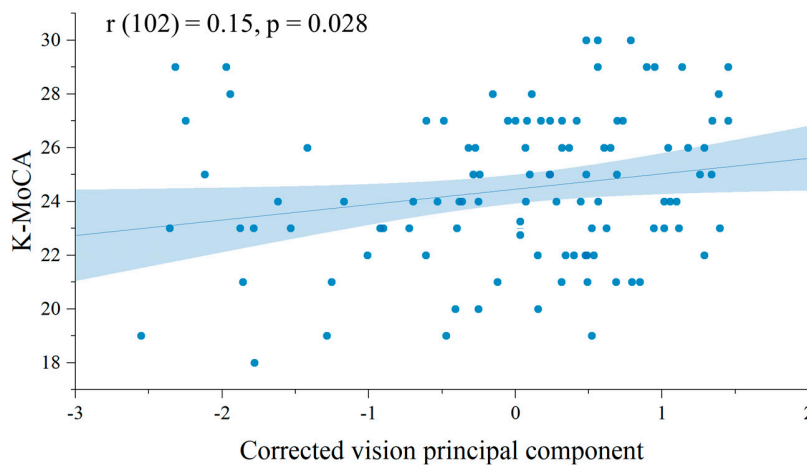

**Figure S7.** Correlation between K-MoCA score and corrected vision principal component

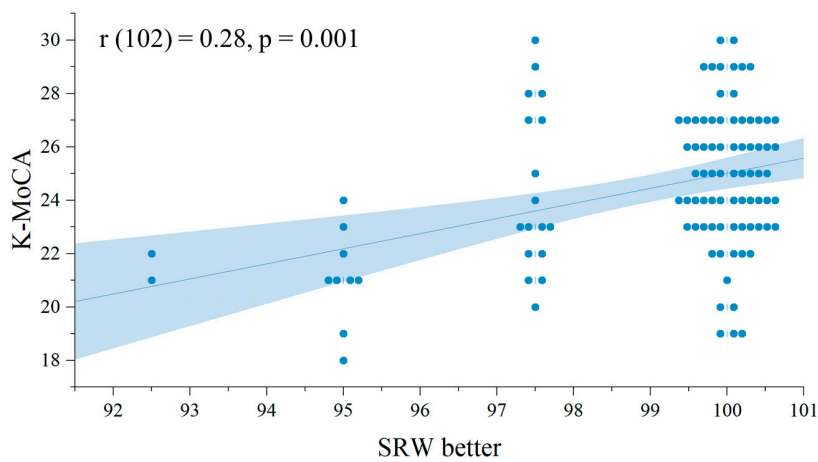

**Figure S8.** Correlation between K-MoCA score and SRW better

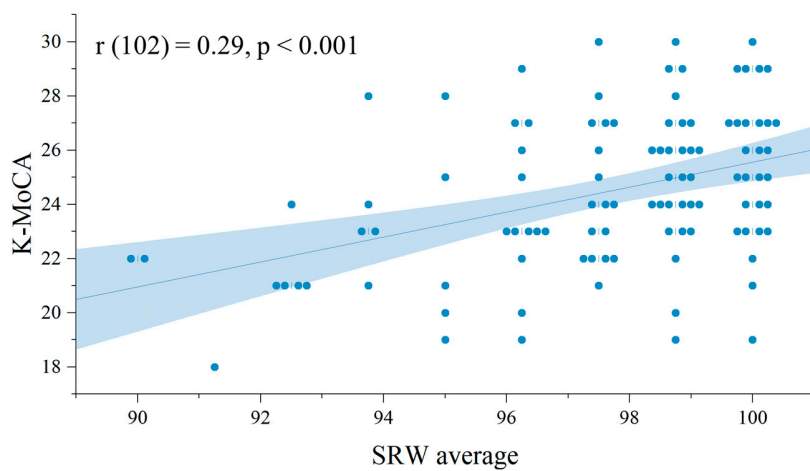

**Figure S9.** Correlation between K-MoCA score and SRW average

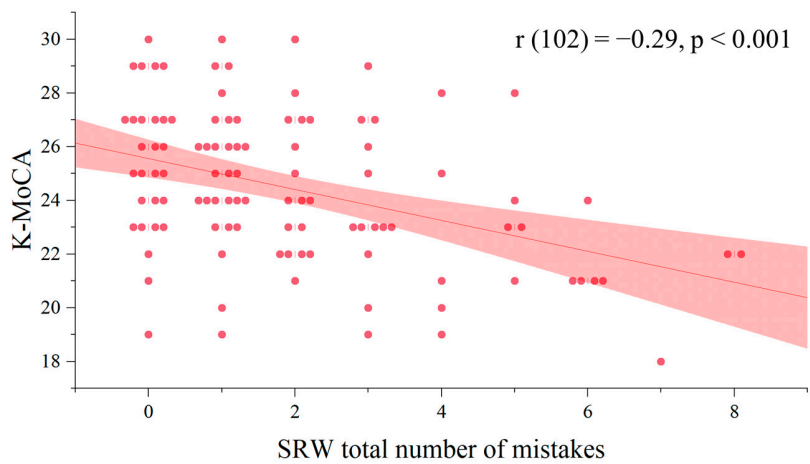

**Figure S10.** Correlation between K-MoCA score and SRW total number of mistakes

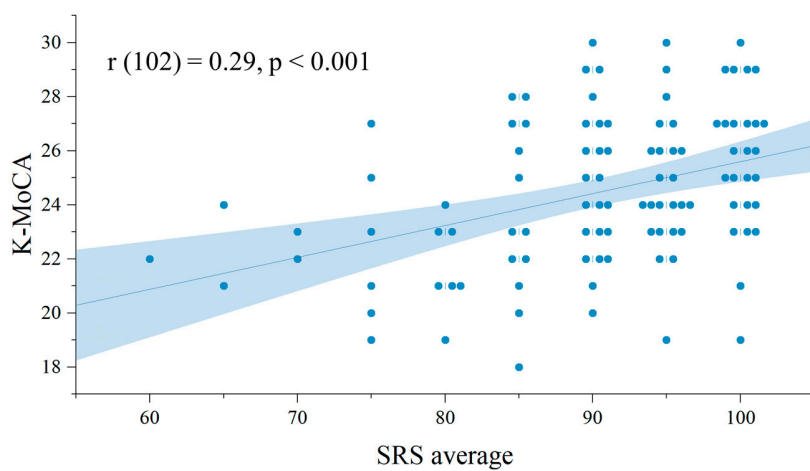

**Figure S11.** Correlation between K-MoCA score and SRS average

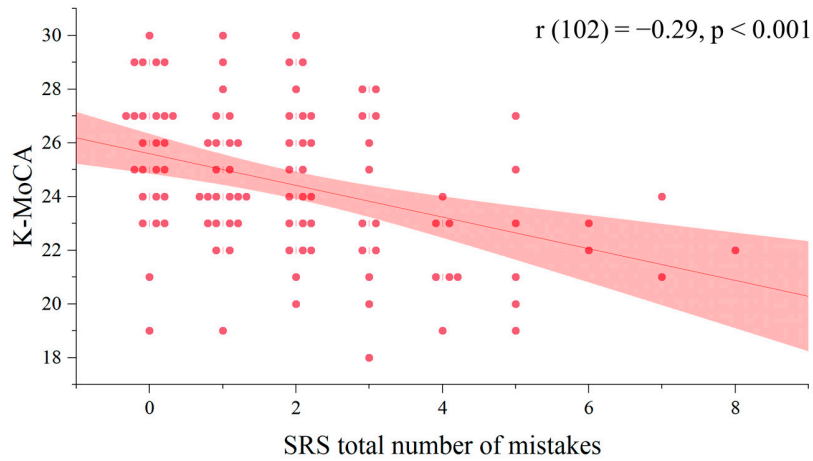

**Figure S12.** Correlation between K-MoCA score and SRS total number of mistakes

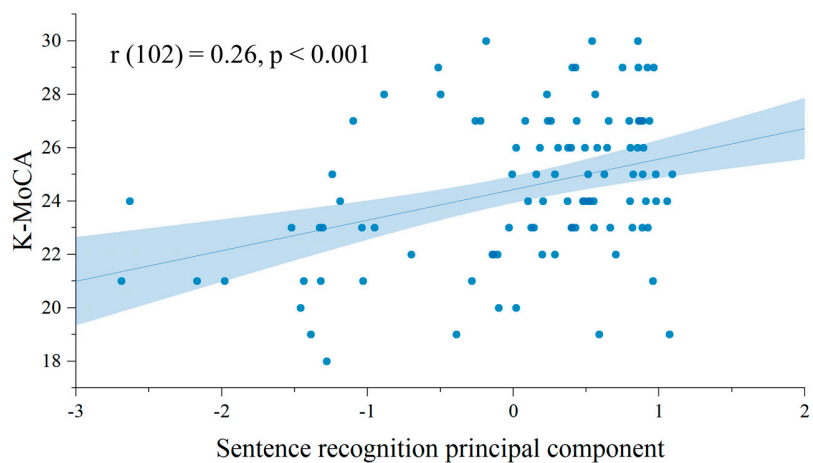

**Figure S13.** Correlation between K-MoCA score and sentence recognition principal component
